# Supplementary material for: Volatile fragrances associated with flowers mediate host plant alternation of a polyphagous mirid bug
Source: PubMed Central journal article supplement (PMC4589772; doi:10.1038/srep14805), 2015-10-01
Supplement: srep14805-s1.pdf [file srep14805-s1.pdf]

## Supplementary Information

### Volatile fragrances associated with flowers mediate host plant alternation of a polyphagous mirid bug

Hongsheng Pan<sup>1,2</sup>, Yanhui Lu<sup>1</sup>, Chunli Xiu<sup>1</sup>, Huihui Geng<sup>1</sup>, Xiaoming Cai<sup>3</sup>, Xiaoling Sun<sup>3</sup>,  
Yongjun Zhang<sup>1</sup>, Livy Williams III<sup>4</sup>, Kris A. G. Wyckhuys<sup>5</sup> & Kongming Wu<sup>1</sup>

<sup>1</sup>State Key Laboratory for Biology of Plant Diseases and Insect Pests, Institute of Plant Protection, Chinese Academy of Agricultural Sciences, Beijing 100193, China, <sup>2</sup>Institute of Plant Protection, Xinjiang Academy of Agricultural Sciences, Urumqi 830091, China, <sup>3</sup>Institute of Tea Research, Chinese Academy of Agricultural Sciences, Hangzhou 310008, China, <sup>4</sup>USDA-ARS European Biological Control Laboratory, Campus International de Baillarguet, CS90013 Montferrier sur Lez, St. Gely du Fesc Cedex 34988, France, <sup>5</sup>International Center for Tropical Agriculture CIAT-Asia, Hanoi, Vietnam.

\* Correspondence author: [yhlu@ippcaas.cn](mailto:yhlu@ippcaas.cn)

**Table S1. Quantification of the four active volatiles in flowering and non-flowering host-plant species.** 2: m-xylene; 3: Butyl acrylate; 4: Butyl propionate; 5: Butyl butyrate. NFP: Non-flowering (vegetative) plants; FP: Flowering plants. Means ( $\pm$  SE) followed by different letters within the same plant species denote significant differences between flowering and non-flowering stages ( $P < 0.05$ ). A total of six volatile samples were analyzed at each growth stage of each plant.

| Plant species                                         | Growth stage | The amount of active volatiles (ng/μl) |                |               |                |
|-------------------------------------------------------|--------------|----------------------------------------|----------------|---------------|----------------|
|                                                       |              | 2                                      | 3              | 4             | 5              |
| <i>Agastache rugosus</i> (Fisch. et Meyer) O. kuntze. | NFP          | 3.72 ± 0.10 a                          | 4.43 ± 0.06 b  | 1.00 ± 0.05 b | 4.30 ± 0.17 b  |
|                                                       | FP           | 0.59 ± 0.02 b                          | 24.53 ± 0.91 a | 2.76 ± 0.17 a | 7.65 ± 0.44 a  |
| <i>Artemisia annua</i> L.                             | NFP          | 1.25 ± 0.04 b                          | 15.36 ± 0.38 b | 1.57 ± 0.09 b | 5.62 ± 0.30 a  |
|                                                       | FP           | 1.85 ± 0.10 a                          | 31.46 ± 1.13 a | 6.03 ± 0.20 a | 6.13 ± 0.23 a  |
| <i>Artemisia argyi</i> Lévl. et Vant.                 | NFP          | 1.73 ± 0.07 b                          | 11.10 ± 0.39 b | 1.20 ± 0.06 b | 1.49 ± 0.12 b  |
|                                                       | FP           | 5.83 ± 0.49 a                          | 28.01 ± 0.99 a | 6.35 ± 0.19 a | 7.07 ± 0.67 a  |
| <i>Artemisia lavandulaefolia</i> DC.                  | NFP          | 0.89 ± 0.04 b                          | 19.12 ± 0.62 b | 2.25 ± 0.08 b | 4.29 ± 0.07 b  |
|                                                       | FP           | 1.80 ± 0.06 a                          | 39.29 ± 2.39 a | 4.54 ± 0.08 a | 9.12 ± 0.36 a  |
| <i>Artemisia scoparia</i> Waldst. et Kit.             | NFP          | 0.08 ± 0.00 b                          | 20.70 ± 0.96 b | 0.79 ± 0.09 b | 0.52 ± 0.09 b  |
|                                                       | FP           | 0.15 ± 0.00 a                          | 40.85 ± 0.41 a | 2.87 ± 0.01 a | 1.60 ± 0.02 a  |
| <i>Cannabis sativa</i> L.                             | NFP          | 0.03 ± 0.00 b                          | 9.56 ± 0.57 b  | 1.10 ± 0.04 b | 0.41 ± 0.01 b  |
|                                                       | FP           | 0.20 ± 0.01 a                          | 20.62 ± 0.54 a | 2.05 ± 0.04 a | 1.20 ± 0.07 a  |
| <i>Chamaemelum nobile</i> (L.) All.                   | NFP          | 0.04 ± 0.00 b                          | 1.48 ± 0.08 b  | 0.11 ± 0.01 b | 1.13 ± 0.07 b  |
|                                                       | FP           | 0.29 ± 0.01 a                          | 10.85 ± 0.33 a | 0.90 ± 0.03 a | 2.63 ± 0.10 a  |
| <i>Chrysanthemum coronarium</i> L.                    | NFP          | 0.43 ± 0.02 b                          | 5.02 ± 0.29 b  | 1.37 ± 0.04 b | 4.20 ± 0.15 b  |
|                                                       | FP           | 0.66 ± 0.01 a                          | 21.11 ± 1.09 a | 3.03 ± 0.29 a | 12.84 ± 0.89 a |
| <i>Coriandrum sativum</i> L.                          | NFP          | 0.02 ± 0.00 b                          | 18.47 ± 1.03 b | 1.22 ± 0.08 b | 0.23 ± 0.01 b  |
|                                                       | FP           | 0.09 ± 0.00 a                          | 44.76 ± 1.30 a | 2.24 ± 0.07 a | 1.95 ± 0.06 a  |
| <i>Fagopyrum esculentum</i> Moench                    | NFP          | 0.14 ± 0.00 b                          | 8.97 ± 0.57 b  | 0.84 ± 0.06 b | 2.11 ± 0.08 b  |
|                                                       | FP           | 0.40 ± 0.02 a                          | 43.70 ± 1.67 a | 2.73 ± 0.08 a | 7.40 ± 0.32 a  |
| <i>Gossypium hirsutum</i> L.                          | NFP          | 2.67 ± 0.15 b                          | 4.65 ± 0.47 b  | 2.47 ± 0.22 b | 4.52 ± 0.27 b  |
|                                                       | FP           | 4.09 ± 0.35 a                          | 39.03 ± 1.61 a | 3.81 ± 0.13 a | 11.32 ± 0.95 a |
| <i>Helianthus annuus</i> L.                           | NFP          | 1.87 ± 0.04 a                          | 2.07 ± 0.04 b  | 0.78 ± 0.04 b | 6.39 ± 0.34 b  |
|                                                       | FP           | 1.60 ± 0.06 b                          | 12.11 ± 0.40 a | 5.10 ± 0.15 a | 8.68 ± 0.24 a  |
| <i>Humulus scandens</i> (Lour.) Merr.                 | NFP          | 10.11 ± 0.48 a                         | 4.13 ± 0.24 b  | 1.43 ± 0.10 b | 5.67 ± 0.03 b  |
|                                                       | FP           | 5.21 ± 0.33 b                          | 19.88 ± 0.68 a | 3.71 ± 0.15 a | 10.84 ± 0.42 a |
| <i>Impatiens balsamina</i> L.                         | NFP          | 4.12 ± 0.09 b                          | 3.32 ± 0.06 b  | 1.29 ± 0.06 b | 4.05 ± 0.06 b  |
|                                                       | FP           | 21.97 ± 0.14 a                         | 51.56 ± 1.34 a | 6.81 ± 0.10 a | 19.53 ± 0.16 a |
| <i>Ocimum basilicum</i> L.                            | NFP          | 1.29 ± 0.02 b                          | 3.05 ± 0.09 b  | 0.94 ± 0.04 b | 4.17 ± 0.11 b  |
|                                                       | FP           | 4.87 ± 0.14 a                          | 9.65 ± 0.41 a  | 4.06 ± 0.20 a | 7.93 ± 0.23 a  |
| <i>Polygonum orientale</i> L.                         | NFP          | 0.03 ± 0.00 b                          | 10.74 ± 0.76 b | 0.54 ± 0.04 b | 0.55 ± 0.02 b  |
|                                                       | FP           | 0.15 ± 0.01 a                          | 33.42 ± 1.31 a | 2.82 ± 0.10 a | 1.79 ± 0.13 a  |
| <i>Ricinus communis</i> L.                            | NFP          | 0.16 ± 0.01 b                          | 2.07 ± 0.03 b  | 0.97 ± 0.04 b | 7.74 ± 0.22 b  |
|                                                       | FP           | 10.15 ± 0.28 a                         | 13.88 ± 0.23 a | 6.18 ± 0.07 a | 9.07 ± 0.25 a  |
| <i>Vigna radiata</i> (L.) Wilczek                     | NFP          | 1.79 ± 0.10 a                          | 1.56 ± 0.09 b  | 0.72 ± 0.04 b | 9.19 ± 0.65 a  |
|                                                       | FP           | 1.31 ± 0.07 b                          | 15.48 ± 1.35 a | 4.48 ± 0.24 a | 9.51 ± 1.06 a  |

**Table S2. List of *Apolygus lucorum* host plants included in the study**

| Scientific name                                       | Common name                | Variety  | Source                                                                                                              |
|-------------------------------------------------------|----------------------------|----------|---------------------------------------------------------------------------------------------------------------------|
| <i>Agastache rugosus</i> (Fisch. et Meyer) O. kuntze. | Wrinkled giant hyssop herb |          | Bred by Institute of Vegetables and Flowers (IVF), Chinese Academy of Agricultural Sciences (CAAS) (Beijing, China) |
| <i>Artemisia annua</i> L.                             |                            |          | Transplanted from agricultural fields                                                                               |
| <i>Artemisia argyi</i> Lévl. et Vant.                 |                            |          | Transplanted from agricultural fields                                                                               |
| <i>Artemisia lavandulaefolia</i> DC.                  |                            |          | Transplanted from agricultural fields                                                                               |
| <i>Artemisia scoparia</i> Waldst. et Kit.             |                            |          | Transplanted from agricultural fields                                                                               |
| <i>Cannabis sativa</i> L.                             | Hemp                       |          | Obtained from IVF, CAAS                                                                                             |
| <i>Chamaemelum nobile</i> (L.) All.                   | Chamomile                  |          | Obtained from IVF, CAAS                                                                                             |
| <i>Chrysanthemum coronarium</i> L.                    | Crowndaisy                 |          | Obtained from IVF, CAAS                                                                                             |
| <i>Coriandrum sativum</i> L.                          | Caraway                    |          | Obtained from IVF, CAAS                                                                                             |
| <i>Fagopyrum esculentum</i> Moench                    | Buckwheat                  |          | Obtained from IVF, CAAS                                                                                             |
| <i>Gossypium hirsutum</i> L.                          | Cotton                     | GK12     | Bred by Biotechnology Research Institute, CAAS (Beijing, China)                                                     |
| <i>Helianthus annuus</i> L.                           | Sunflower                  |          | Obtained from IVF, CAAS                                                                                             |
| <i>Humulus scandens</i> (Lour.) Merr.                 | Scandent hop               |          | Transplanted from agricultural fields                                                                               |
| <i>Impatiens balsamina</i> L.                         | Balsam                     |          | Obtained from IVF, CAAS                                                                                             |
| <i>Ocimum basilicum</i> L.                            | Sweet basil                |          | Obtained from IVF, CAAS                                                                                             |
| <i>Polygonum orientale</i> L.                         | Smartweed                  |          | Obtained from IVF, CAAS                                                                                             |
| <i>Ricinus communis</i> L.                            | Castor bean plant          | Fengbi 6 | Bred by Cash Crop Research Institute, Shanxi Academy of Agricultural Sciences (Taiyuan, China)                      |
| <i>Vigna radiata</i> (L.) Wilczek                     | Mungbean                   | JILVDOU2 | Bred by Baoding Institute of Agricultural Sciences (Baoding, China)                                                 |
